# Supplementary material for: Multiple Resistance Mechanisms Involved in Glyphosate Resistance in Eleusine indica
Source: MDPI journal article supplement (doi:10.3390/plants11233199), 2022-11-23
Supplement: s1 [file s1]

**Table S1.** Quality assessment of sequencing data of *Eleusine indica* (L.) Gaertn.

| Sample  | Raw reads | Clean reads | Clean bases | Error rate(%) | Q20(%) | Q30(%) | GC content(%) |
|---------|-----------|-------------|-------------|---------------|--------|--------|---------------|
| CK_R1_1 | 49273852  | 48742578    | 7.26G       | 0.0245        | 98.15  | 94.75  | 55.51         |
| CK_R1_2 | 57156216  | 56682684    | 8.43G       | 0.0243        | 98.26  | 94.94  | 56.64         |
| CK_R1_3 | 55572836  | 55093634    | 8.24G       | 0.0241        | 98.33  | 95.12  | 56.89         |
| CK_R2_1 | 57667286  | 57193890    | 8.51G       | 0.0242        | 98.3   | 95.02  | 55.95         |
| CK_R2_2 | 51420504  | 51009050    | 7.61G       | 0.0243        | 98.25  | 94.86  | 56.39         |
| CK_R2_3 | 55534526  | 55077946    | 8.20G       | 0.024         | 98.37  | 95.19  | 56.65         |
| CK_S_1  | 53870186  | 53394964    | 7.98G       | 0.0241        | 98.33  | 95.15  | 56.97         |
| CK_S_2  | 50375378  | 50002742    | 7.46G       | 0.024         | 98.37  | 95.21  | 57.24         |
| CK_S_3  | 49032528  | 48661402    | 7.26G       | 0.0241        | 98.36  | 95.15  | 55.2          |
| T_R1_1  | 58414340  | 57972622    | 8.64G       | 0.0241        | 98.34  | 95.11  | 56.43         |
| T_R1_2  | 56729902  | 56308918    | 8.37G       | 0.0241        | 98.32  | 95.07  | 55.56         |
| T_R1_3  | 58332378  | 57808062    | 8.62G       | 0.0244        | 98.22  | 94.8   | 55.54         |
| T_R2_1  | 58248166  | 57734872    | 8.60G       | 0.0244        | 98.23  | 94.81  | 55.59         |
| T_R2_2  | 55698446  | 55273330    | 8.22G       | 0.0243        | 98.24  | 94.85  | 55.89         |
| T_R2_3  | 52302004  | 51757640    | 7.69G       | 0.0243        | 98.25  | 94.88  | 54.35         |
| T_S_1   | 48742902  | 48312828    | 7.20G       | 0.0243        | 98.26  | 94.9   | 55.08         |
| T_S_2   | 55139630  | 54707748    | 8.15G       | 0.0243        | 98.28  | 94.94  | 54.54         |
| T_S_3   | 56623568  | 56180024    | 8.37G       | 0.0242        | 98.32  | 95.04  | 55.29         |

**Table S2.** Transcriptional splicing data statistics

| Assembly quality parameters | Transcripts | Unigenes  |
|-----------------------------|-------------|-----------|
| 200-500bp                   | 12998       | 14928     |
| 500-1kbp                    | 11709       | 17032     |
| 1k-2kbp                     | 9739        | 21979     |
| >2kbp                       | 10843       | 25179     |
| Maximum length              | 36898       | 36898     |
| Minimum length              | 201         | 201       |
| Average length              | 1406.78     | 1683.30   |
| N50 value                   | 2318        | 2454      |
| N90 value                   | 2978        | 2410      |
| Total nucleotides           | 63711510    | 133179639 |

**Table S3.** Primers for fluorescent quantitative of *Eleusine indica* (L.) Gaertn.

| Primer            | Sequence (5'—3')          |
|-------------------|---------------------------|
| <i>ABCB2</i> -F   | GGCGTGGAGTTCCGTTACCC      |
| <i>ABCB2</i> -R   | CCCGATCATCATAAGCCTTGCA    |
| <i>ABCC4</i> -F   | GGGTTGATGTGGAGGTGAGGA     |
| <i>ABCC4</i> -R   | ACAAGCACGTATGACTTCGGAATAT |
| <i>ABCG50</i> -F  | ACTGCTCAGGTTATACTTGCTAC   |
| <i>ABCG50</i> -R  | TCGGAAGAATACGGACATTGC     |
| <i>ABCG11</i> -F  | GGAGGAGCAGTGGTGAAGAA      |
| <i>ABCG11</i> -R  | CGAACCGCAGCCAGTAGTA       |
| <i>ABCA</i> -F    | ACAAGCACGTATGACTTCGGAATAT |
| <i>ABCA</i> -R    | GCGACACTTAGCCTTCTCTTC     |
| <i>AKR4C10</i> -F | ACCGCAACGAGAAGGAGGTAGGA   |
| <i>AKR4C10</i> -R | CGGGATGTCGGATGGGATGA      |
| <i>AKR2</i> -F    | ATATGCCTAGACTTCGACCAGA    |
| <i>AKR2</i> -R    | TCTCAGAATCCCACAAGGTG      |
| <i>CYP88</i> -F   | AAACAGGTGCTGATGGATGACGA   |
| <i>CYP88</i> -R   | GATGAAGCCGAGGTAGGTGGTG    |
| <i>CYP89</i> -F   | AGACGACAACAACGCTGGTGGAG   |
| <i>CYP89</i> -R   | CGAACGGCATCATCTTGATCTCC   |
| <i>GST1</i> -F    | TGTCTGCTTGGCTAAATGT       |
| <i>GST1</i> -R    | CTATCCTCAATCCTGGTCAC      |

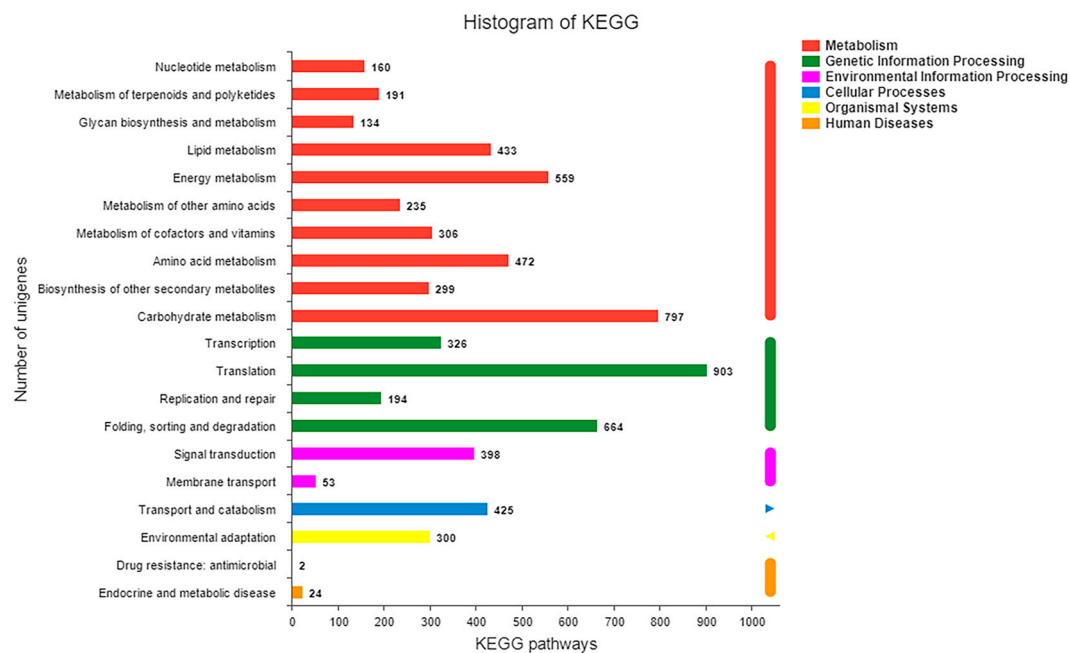

**Figure. S1** Classification of KEGG function annotation *Eleusine indica*. The y-axis lists the various KEGG pathways. The x-axis indicates the number of genes. According to participation in KEGG pathways, unigenes were classified into six categories: Metabolism, Genetic Information Processing, Environmental Information Processing, Cellular Process, Organismal Systems and Human Diseases.

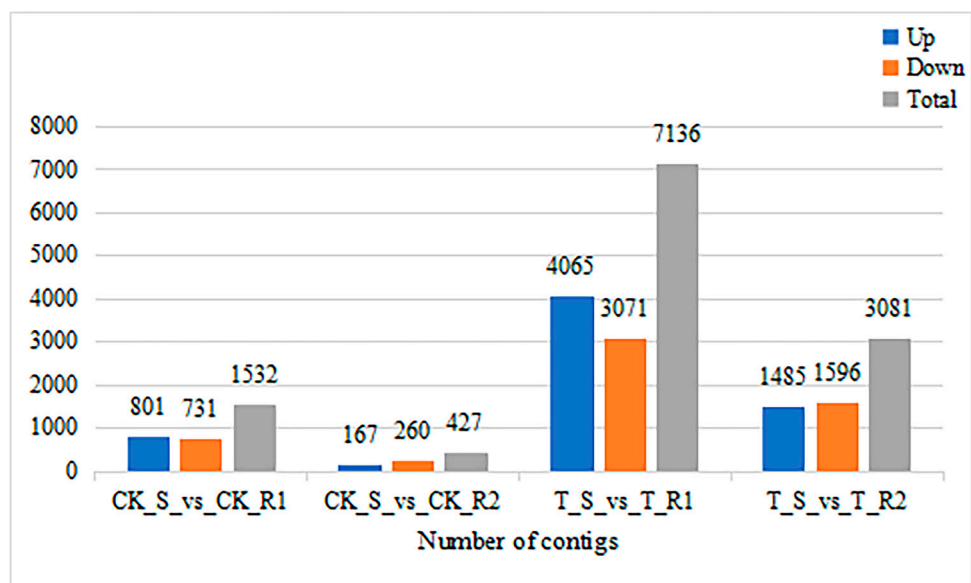

**Figure. S2** The number of DEGS between the different groups
